# Supplementary material
Source: PubMed Central journal article supplement (PMC4684741)

## Supplementary Materials

### **Disparate mutations confer therapeutic gain of Hsp104 function**

Meredith E. Jackrel<sup>1</sup>, Keolamau Yee<sup>1</sup>, Amber Tariq<sup>1</sup>, Annie I. Chen<sup>1,2</sup>, and James Shorter<sup>1,2\*</sup>

<sup>1</sup>Department of Biochemistry and Biophysics, <sup>2</sup>Cell and Molecular Biology Graduate Group, Perelman School of Medicine at the University of Pennsylvania, Philadelphia, PA 19104, U.S.A.

\*Correspondence: [jshorter@mail.med.upenn.edu](mailto:jshorter@mail.med.upenn.edu)

Running title: Diversity of enhanced Hsp104 variants

**Keywords:** Hsp104 / ALS / protein misfolding / amyloid / protein engineering

**Supplementary Figure 1. Hsp110 is not required for Hsp104-mediated suppression of TDP-43 toxicity.** BY4741 WT,  $\Delta$ *sse1*, and  $\Delta$ *sse2* yeast strains were transformed with 413GAL TDP-43 and the indicated Hsp104 missense mutants or control. Strains were serially diluted fivefold and spotted on glucose (off) or galactose (on) media.

**Supplementary Figure 2. Deletion of MD motif 2, helix 3, or helix 4 potentiates Hsp104.** W303 $\Delta$ *hsp104* yeast integrated with pAG303GAL-FUS (left) or pAG303GAL- $\alpha$ -syn + pAG304GAL- $\alpha$ -syn (right) was transformed with the indicated 416GAL-Hsp104 deletion construct, empty plasmid, Hsp104<sup>WT</sup>, or Hsp104<sup>A503V</sup>. Strains were serially diluted fivefold and spotted on glucose (off) or galactose (on) media.

**Supplementary Table 1. Potentiating Hsp104 mutations.**

The mutations that potentiate Hsp104 activity, their location, and their identification are listed.

| <b>Potentiating Mutations</b> | <b>Middle domain helix</b> | <b>Source</b>        |
|-------------------------------|----------------------------|----------------------|
| V426L/G                       | 1                          | Jackrel et al., 2014 |
| A437W                         | Distal loop                | Jackrel et al., 2014 |
| K451E                         | 2                          | This paper           |
| R465G                         | 2                          | This paper           |
| Y466S                         | 2                          | This paper           |
| E469D                         | 2                          | This paper           |
| K470Q                         | 2                          | This paper           |
| E474V                         | 2                          | This paper           |
| K480E                         | 2                          | This paper           |
| L483S                         | 2                          | This paper           |
| A493T                         | 2                          | This paper           |
| D498V                         | 3                          | Jackrel et al., 2014 |
| A503X*                        | 3                          | Jackrel et al., 2014 |
| D504V                         | 3                          | Jackrel et al., 2014 |
| Y507A/C/D/V                   | 3                          | Jackrel et al., 2014 |
| P511A                         | 4                          | This paper           |
| I513F                         | 4                          | This paper           |
| G532S                         | 4                          | This paper           |
| M536K                         | 4                          | This paper           |
| N539L/E/D/G/K                 | Small domain NBD1          | Jackrel et al., 2014 |
| A430V-K514E                   | Distal loop and 4          | This paper           |
| A430V-N534I                   | Distal loop and 4          | This paper           |
| A430V-K514E-N534I             | Distal loop and 4          | This paper           |

\*X = any amino acid except A or P

**Supplementary Table 2, Mutations in the Hsp104 MD that do not potentiate activity.**

The MD mutations do not that potentiate Hsp104 activity, their location, and their identification are listed.

| <b>Non-potentiating Mutations</b> | <b>Middle domain helix</b> | <b>Source</b>        |
|-----------------------------------|----------------------------|----------------------|
| Q425R                             | 1                          | This paper           |
| E427K                             | 1                          | This paper           |
| A430V                             | Distal loop                | This paper           |
| E432D                             | Distal loop                | This paper           |
| S439T                             | Distal loop                | This paper           |
| L447I                             | 2                          | This paper           |
| L455S                             | 2                          | This paper           |
| E457K                             | 2                          | This paper           |
| L459S                             | 2                          | This paper           |
| R463K                             | 2                          | This paper           |
| K470R                             | 2                          | This paper           |
| K481R                             | 2                          | This paper           |
| D484G                             | 2                          | This paper           |
| N488I                             | 2                          | This paper           |
| T499V                             | 3                          | Jackrel et al., 2014 |
| A500V                             | 3                          | Jackrel et al., 2014 |
| T501V                             | 3                          | Jackrel et al., 2014 |
| A502V                             | 3                          | Jackrel et al., 2014 |
| L505V                             | 3                          | Jackrel et al., 2014 |
| R506V                             | 3                          | Jackrel et al., 2014 |
| K514E                             | 4                          | This paper           |
| Q523R                             | 4                          | This paper           |
| E528G                             | 4                          | This paper           |
| A531V                             | 4                          | This paper           |
| N534I                             | 4                          | This paper           |

Fig. S1. Jackrel et al.

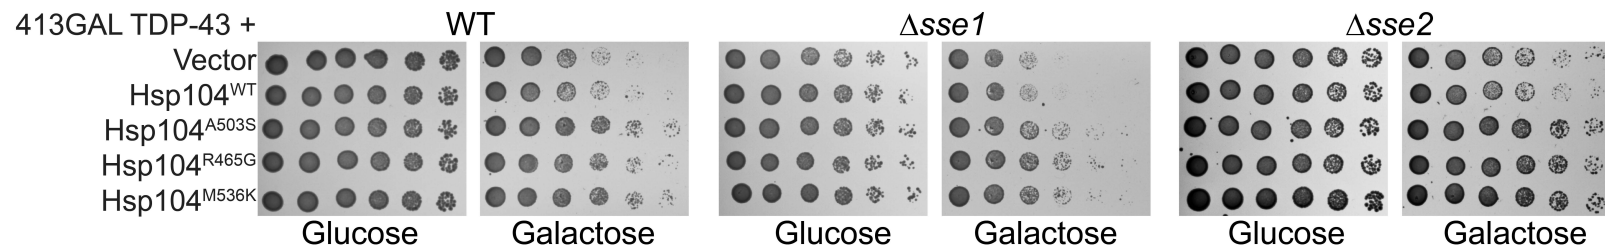

Fig. S2. Jackrel et al.

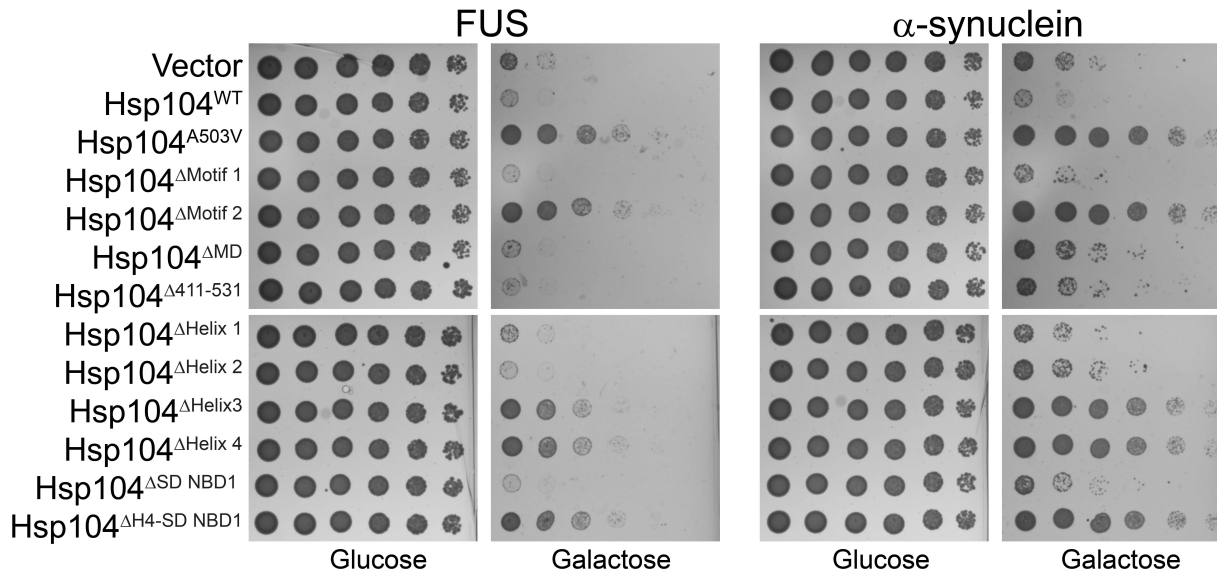

Supplement: NIHMS737735-supplement-supplement_1.pdf [file NIHMS737735-supplement-supplement_1.pdf]
